# Supplementary material for: Heat dissipation during hovering and forward flight in hummingbirds
Source: PubMed Central journal article supplement (PMC4807464; doi:10.1098/rsos.150598), 2015-12-16
Supplement: rsos150598supp2.pdf [file rsos150598supp2.pdf]

Table S1. Back-transformed predicted means and standard errors from general linear mixed models of mean  $T_s$ , maximum  $T_s$  and area as a function of flight speed for each heat dissipation region (HDAs).

| Measurement             | Region | Flight Speed (m/s) |       |       |       |       |       |       | Standard Error of Differences |         |         |
|-------------------------|--------|--------------------|-------|-------|-------|-------|-------|-------|-------------------------------|---------|---------|
|                         |        | 0                  | 2     | 4     | 6     | 8     | 10    | 12    | Average                       | Minimum | Maximum |
| Mean $T_s$ (°C)         | Body   | 24.56              | 24.06 | 24.16 | 24.05 | 24.00 | 23.96 | 24.00 | 0.3212                        | 0.2330  | 0.4461  |
|                         | Hean   | 30.21              | 30.17 | 29.86 | 29.54 | 29.85 | 29.73 | 29.63 | 0.1844                        | 0.1318  | 0.2557  |
|                         | Feet   | 29.17              | 28.05 | 28.74 | 28.16 | 28.48 | 28.58 | 28.72 | 0.6550                        | 0.4865  | 0.8434  |
|                         | Axial  | 30.73              | 29.66 | 30.06 | 29.63 | 30.14 | 30.2  | 30.57 | 0.2992                        | 0.2323  | 0.3838  |
| Maximum $T_s$ (°C)      | Body   | 37.65              | 34.74 | 34.24 | 33.91 | 34.02 | 34.75 | 34.76 | 0.6538                        | 0.6453  | 0.6751  |
|                         | Eye    | 34.92              | 34.03 | 33.57 | 33.22 | 33.26 | 33.03 | 32.67 | 0.2535                        | 0.2501  | 0.2619  |
|                         | Feet   | 35.28              | 29.01 | 28.13 | 28.01 | 28.01 | 28.45 | 28.01 | 0.7169                        | -       | -       |
|                         | Axial  | 36.28              | 34.24 | 33.8  | 33.9  | 33.9  | 35.67 | 35.55 | 0.6970                        | 0.6789  | 0.7422  |
| Area (mm <sup>2</sup> ) | Eye    | 45.38              | 27.97 | 24.93 | 23.91 | 19.01 | 18.1  | 14.42 | 2.559                         | 2.525   | 2.643   |
|                         | Axial  | 54.95              | 35.39 | 24.75 | 21.11 | 22.1  | 31.78 | 22.97 | 5.617                         | 5.473   | 5.975   |
