# Supplementary material for: Heat dissipation during hovering and forward flight in hummingbirds
Source: PubMed Central journal article supplement (PMC4807464; doi:10.1098/rsos.150598), 2015-12-16
Supplement: rsos150598supp3.pdf [file rsos150598supp3.pdf]

Table S2. Parameter estimations for calculation of  $C_s$ . Air velocity at 0 m/s was calculated from near-body PIV mid torso.

| $v$ (m/s) | $Re$  | $Nu$  | $h$ ( $m^2/s$ ) | $T_s$ |
|-----------|-------|-------|-----------------|-------|
| 1.52      | 1342  | 25.59 | 43.56           | 24.95 |
| 2         | 1766  | 30.17 | 51.36           | 24.24 |
| 4         | 3532  | 45.74 | 77.84           | 24.17 |
| 6         | 5297  | 58.33 | 99.28           | 24.05 |
| 8         | 7063  | 69.32 | 117.99          | 23.94 |
| 10        | 8829  | 79.25 | 134.89          | 24.11 |
| 12        | 10595 | 88.42 | 150.48          | 23.65 |
