# Supplementary material for: Heat dissipation during hovering and forward flight in hummingbirds
Source: PubMed Central journal article supplement (PMC4807464; doi:10.1098/rsos.150598), 2015-12-16
Supplement: rsos150598supp4.pdf [file rsos150598supp4.pdf]

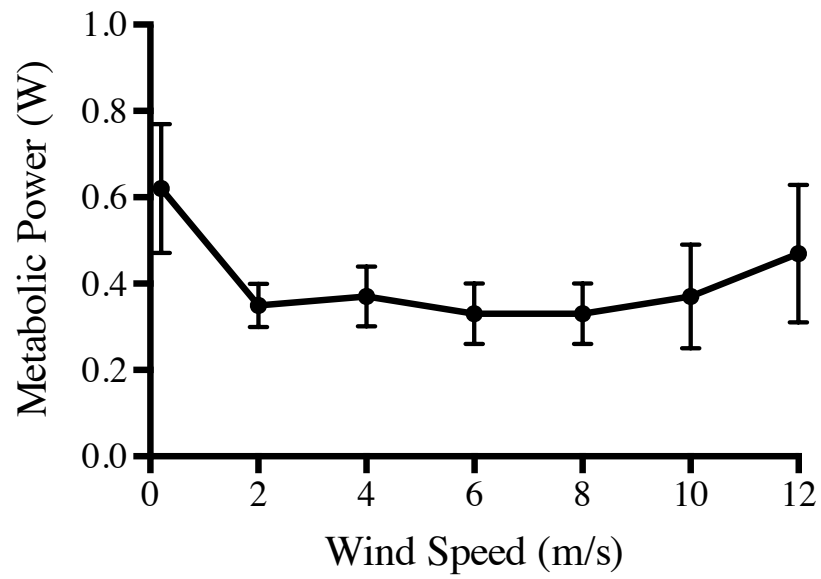

Figure S1. Metabolic power for flight across wind speeds used in this study. The curve exhibits the “U”-shaped pattern seen in other hummingbird species.
